# Supplementary material for: Dynamical changes in seismic properties prior to, during, and after the 2014–2015 Holuhraun eruption, Iceland
Source: Copernicus journal article supplement (doi:10.5194/nhess-24-4075-2024), 2024-11-27
Supplement: Supplementary file 1 [file nhess-24-4075-2024-supplement.pdf]

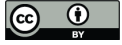

*Supplement of*

## **Dynamical changes in seismic properties prior to, during, and after the 2014–2015 Holuhraun eruption, Iceland**

**Maria R. P. Sudibyo et al.**

*Correspondence to:* Maria R. P. Sudibyo ([pujiastutisudibyo@uni-potsdam.de](mailto:pujiastutisudibyo@uni-potsdam.de))

The copyright of individual parts of the supplement might differ from the article licence.

| Expert Interpretation \ K-means           | Cluster 1 | Cluster 2              | Cluster 3 |
|-------------------------------------------|-----------|------------------------|-----------|
| Quiescence                                | 0.950     | $8.298 \times 10^{-5}$ | 0.049     |
| Dyke Propagation (S1-S4)                  | 0         | 0.964                  | 0.036     |
| Eruption and presumed subglacial eruption | 0.232     | 0.013                  | 0.755     |

Table S1: Confusion matrix between clusters formed by K-means and the expert interpretation using PE, PPE and IF. It shows that 95% of the data points during quiescence are classified into cluster 1, 96.4% of the data points during the dyke propagation are classified into cluster 2, and 75.5% of the data points during the eruption are classified into cluster 3. The summation of values in each row is equal to 1.

| Expert Interpretation \ K-means           | Cluster 1 | Cluster 2 | Cluster 3              |
|-------------------------------------------|-----------|-----------|------------------------|
| Quiescence                                | 0.953     | 0.046     | $8.298 \times 10^{-5}$ |
| Dyke Propagation (S1-S4)                  | 0         | 0.036     | 0.964                  |
| Eruption and presumed subglacial eruption | 0.234     | 0.744     | 0.022                  |

Table S2: Confusion matrix between clusters formed by K-means and the expert interpretation using PE, PPE, IF and RMS. It shows that 95.3% of the data points during quiescence are classified into cluster 1, 96.4% of the data points during the dyke propagation are classified into cluster 3, and 74.4% of the data points during the eruption are classified into cluster 2. The summation of values in each row is equal to 1.

| Expert Interpretation \ K-means           | Cluster 1 | Cluster 2              | Cluster 3 |
|-------------------------------------------|-----------|------------------------|-----------|
| Quiescence                                | 0.950     | $8.298 \times 10^{-5}$ | 0.049     |
| Dyke Propagation (S1-S4)                  | 0         | 0.964                  | 0.036     |
| Eruption and presumed subglacial eruption | 0.231     | 0.012                  | 0.756     |

Table S3: Confusion matrix between clusters formed by K-means and the expert interpretation using PE, PPE, IF and RMeS. It shows that 95% of the data points during quiescence are classified into cluster 1, 96.4% of the data points during the dyke propagation are classified into cluster 2, and 75.6% during the eruption are classified to cluster 3. The summation of values in each row is equal to 1.

| Expert Interpretation \ K-means           | Cluster 1 | Cluster 2 | Cluster 3              |
|-------------------------------------------|-----------|-----------|------------------------|
| Quiescence                                | 0.979     | 0.02      | $8.298 \times 10^{-5}$ |
| Dyke Propagation (S1-S4)                  | 0         | 0.029     | 0.971                  |
| Eruption and presumed subglacial eruption | 0.178     | 0.810     | 0.012                  |

Table S4: Confusion matrix between clusters formed by K-means and the expert interpretation using PE, PPE, IF and log(RMS).. It shows that 97.9% of the data points during quiescence are classified into cluster 1, 97.1% of the data points during the dyke propagation are classified into cluster 3, and 81% of the data points during the eruption and presumed subglacial eruption are classified into cluster 2. The summation of values in each row is equal to 1.

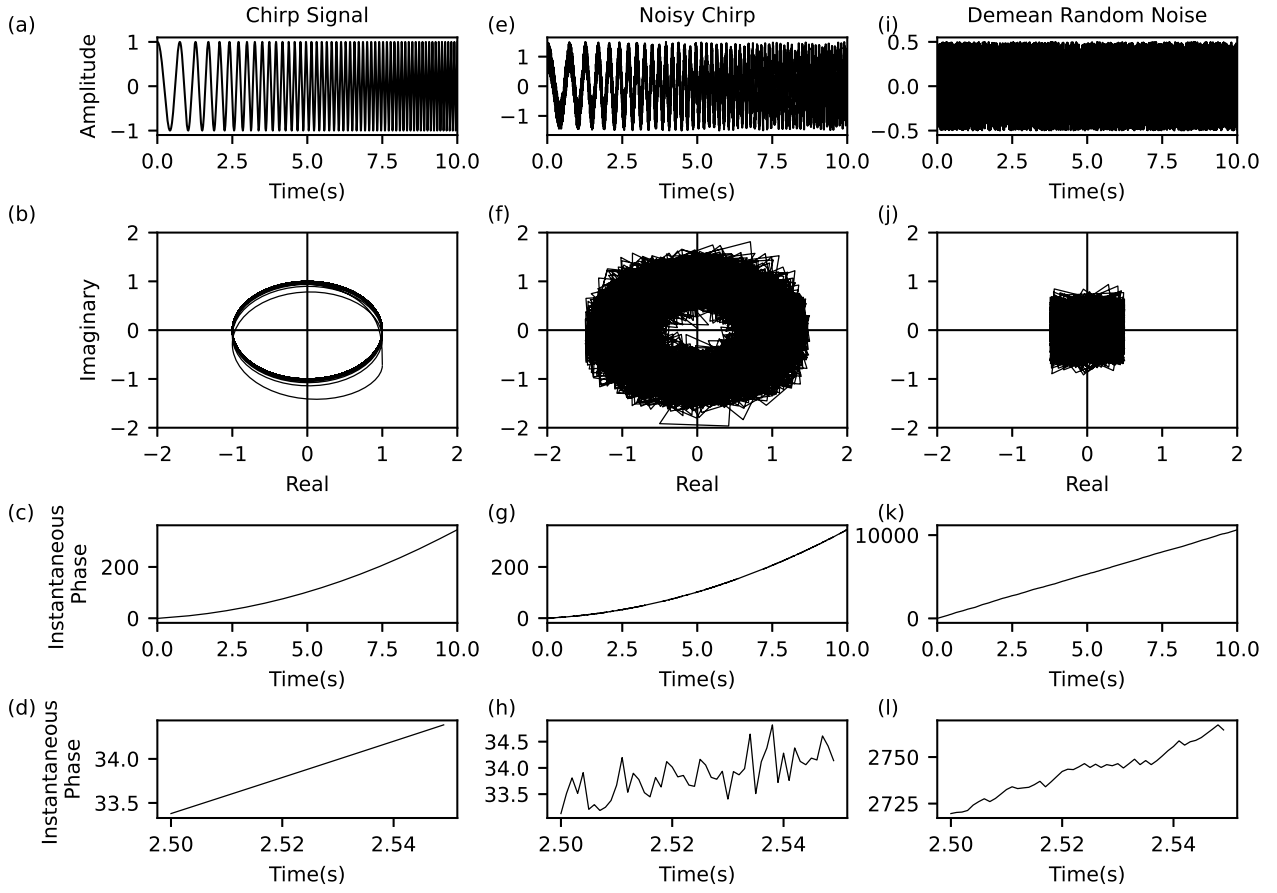

Figure S1: (a) Time series, (b) the analytical signal, (c) and the instantaneous phase (d) 0.5 s close up of the instantaneous phase for a synthetic chirp signal. (e-h) same as subfigure (a-d) for a noisy chirp and (i-l) same as subfigures (a-d) for noise.

| Expert Interpretation                     | K-means   |           |                        |
|-------------------------------------------|-----------|-----------|------------------------|
|                                           | Cluster 1 | Cluster 2 | Cluster 3              |
| Quiescence                                | 0.962     | 0.037     | $8.298 \times 10^{-5}$ |
| Dyke Propagation (S1-S4)                  | 0         | 0.036     | 0.964                  |
| Eruption and presumed subglacial eruption | 0.122     | 0.865     | 0.013                  |

Table S5: Confusion matrix between clusters formed by K-means and the expert interpretation using PE, PPE, IF and log(RMeS). The first row shows that 96.2% of the data points during quiescence are classified into cluster 1, 96.4% of the data points during the dyke propagation are classified into cluster 3, and 86.5% of the data points during the eruption are classified into cluster 2. The summation of values in each row is equal to 1.

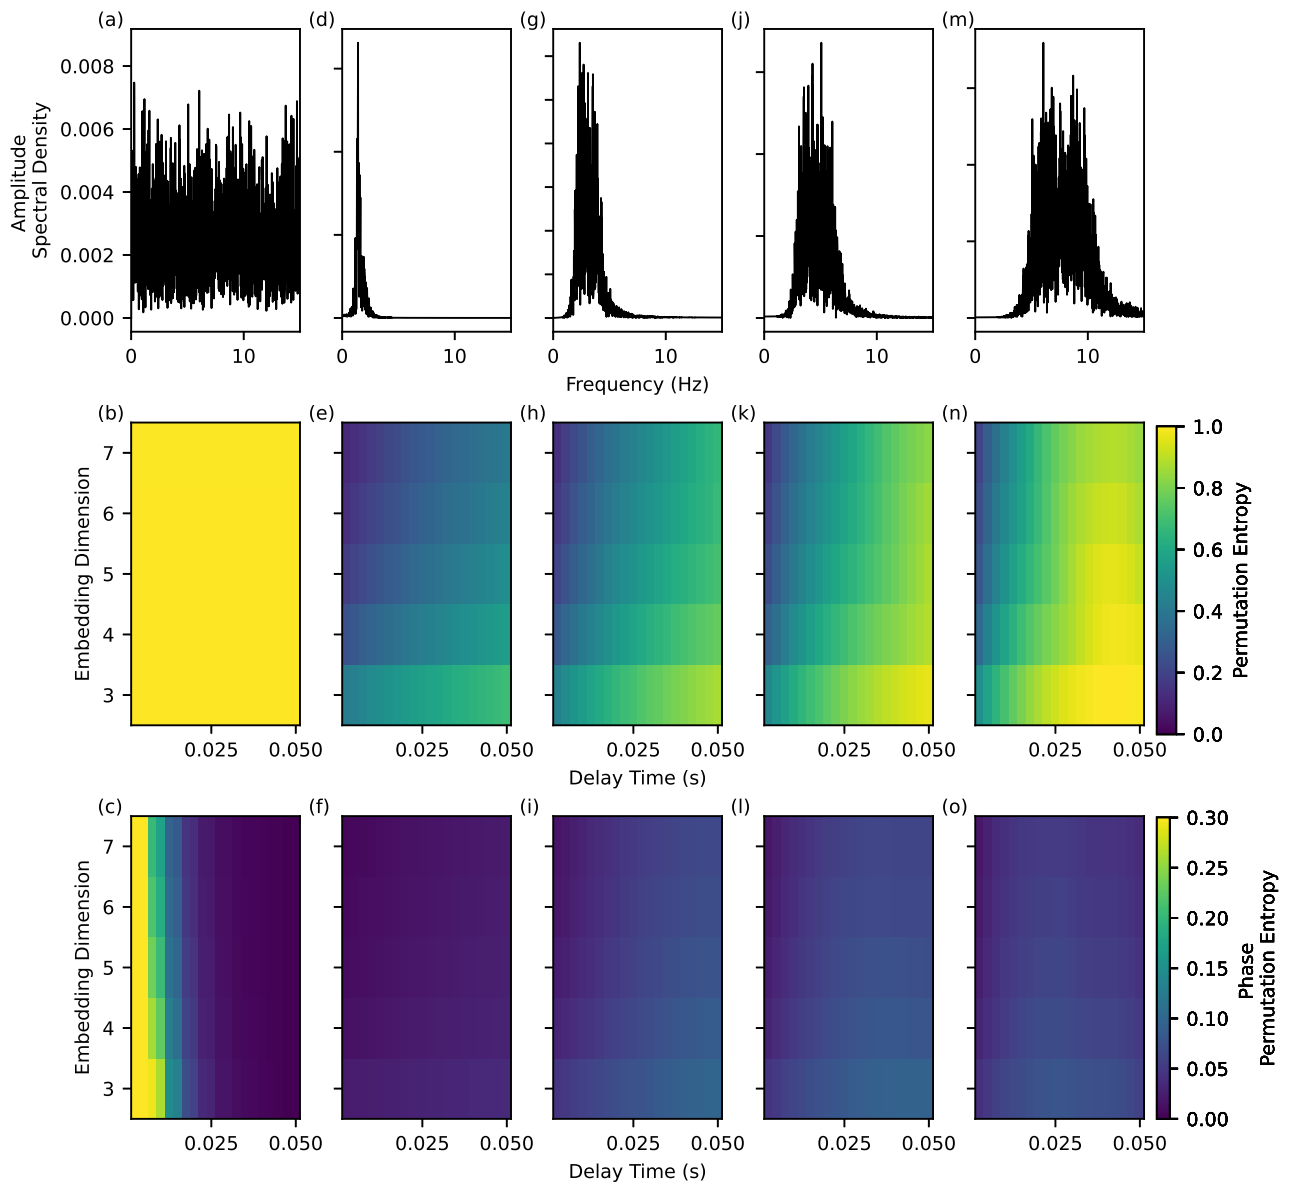

Figure S2: Noise in different frequencies spectrum and their corresponding PE and PPE, unfiltered random noise (a-c), 1-2 Hz (d-f), 2-4 Hz (g-i), 3-6 Hz (j-l), 5-10 Hz (m-o).

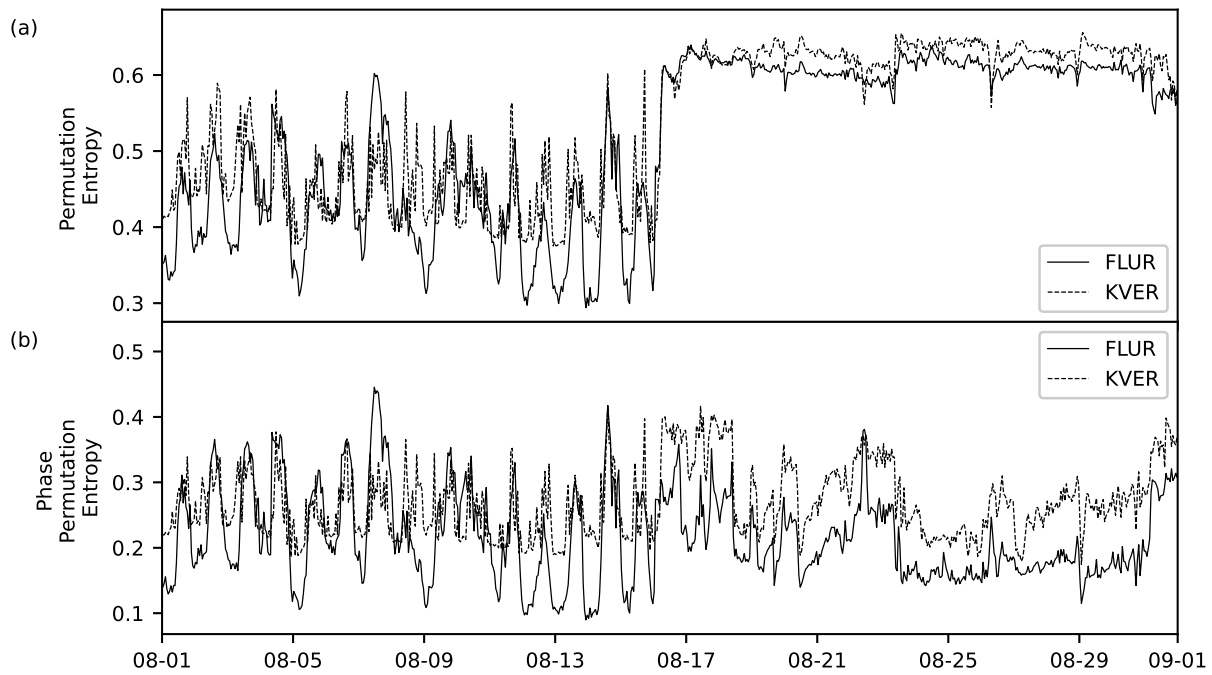

Figure S3: (a) PE and (b) PPE comparison between stations FLUR and KVER, both vertical components, bandpass-filtered from 0.5 to 10 Hz.

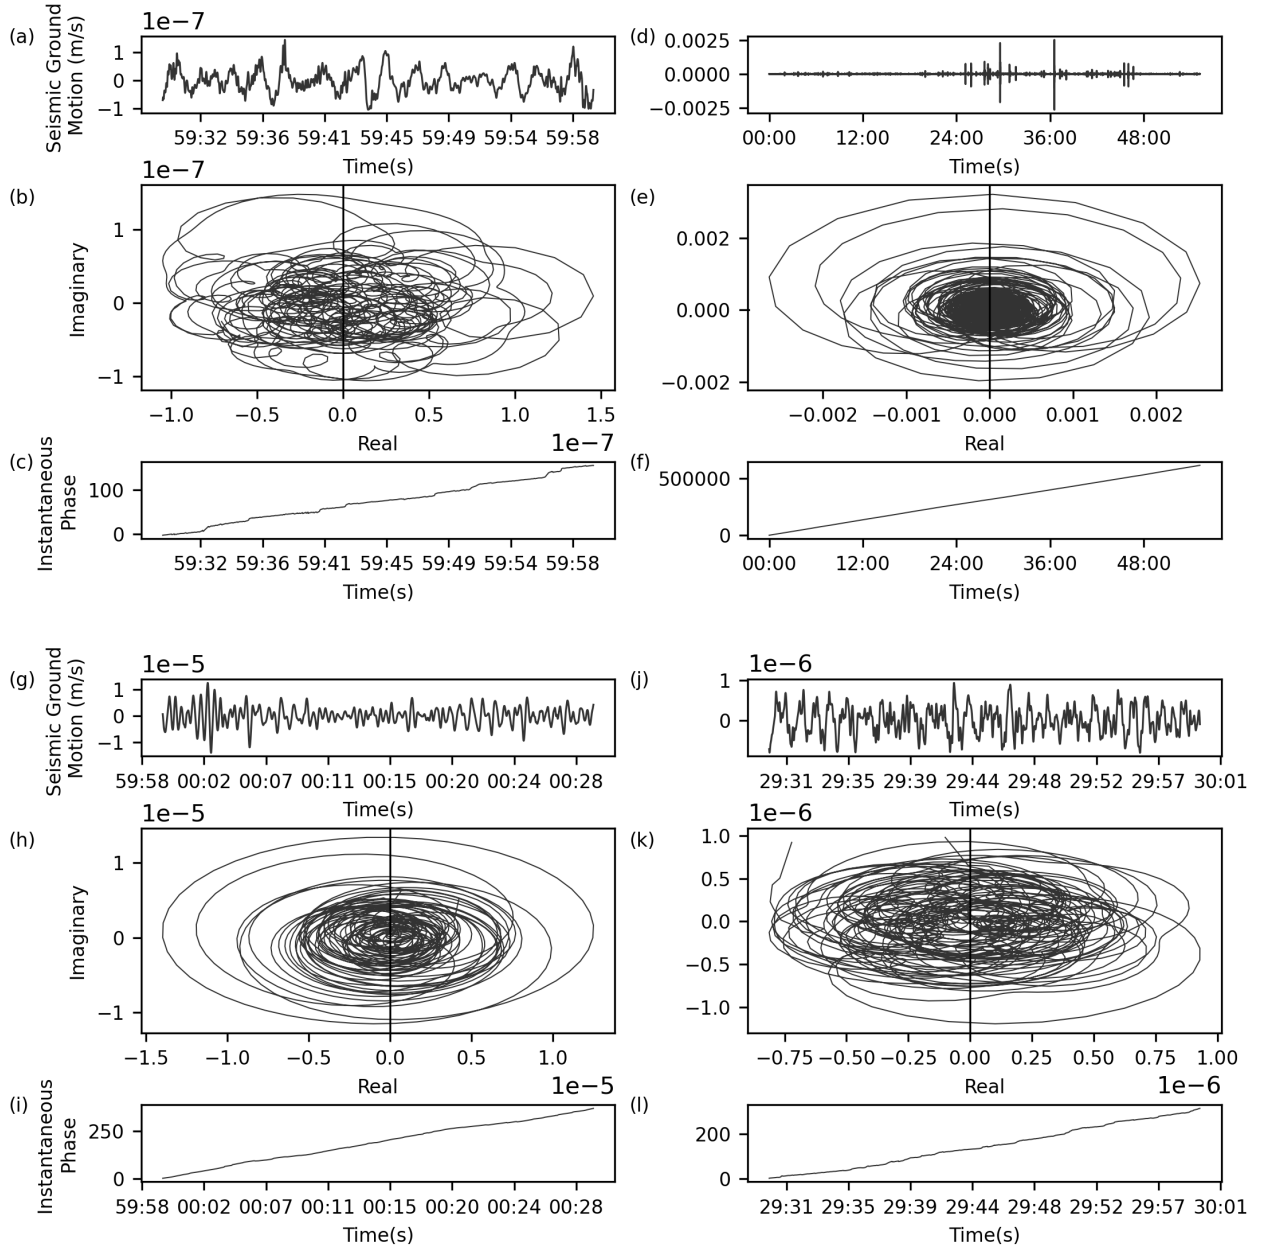

Figure S4: The comparison of the signal projection in the complex plane and its instantaneous phase for ambient noise on 17 June (a-c), VT events on 25 August (d-f), tremor on 3 September (g-i), and tremor on 10 September (j-l).

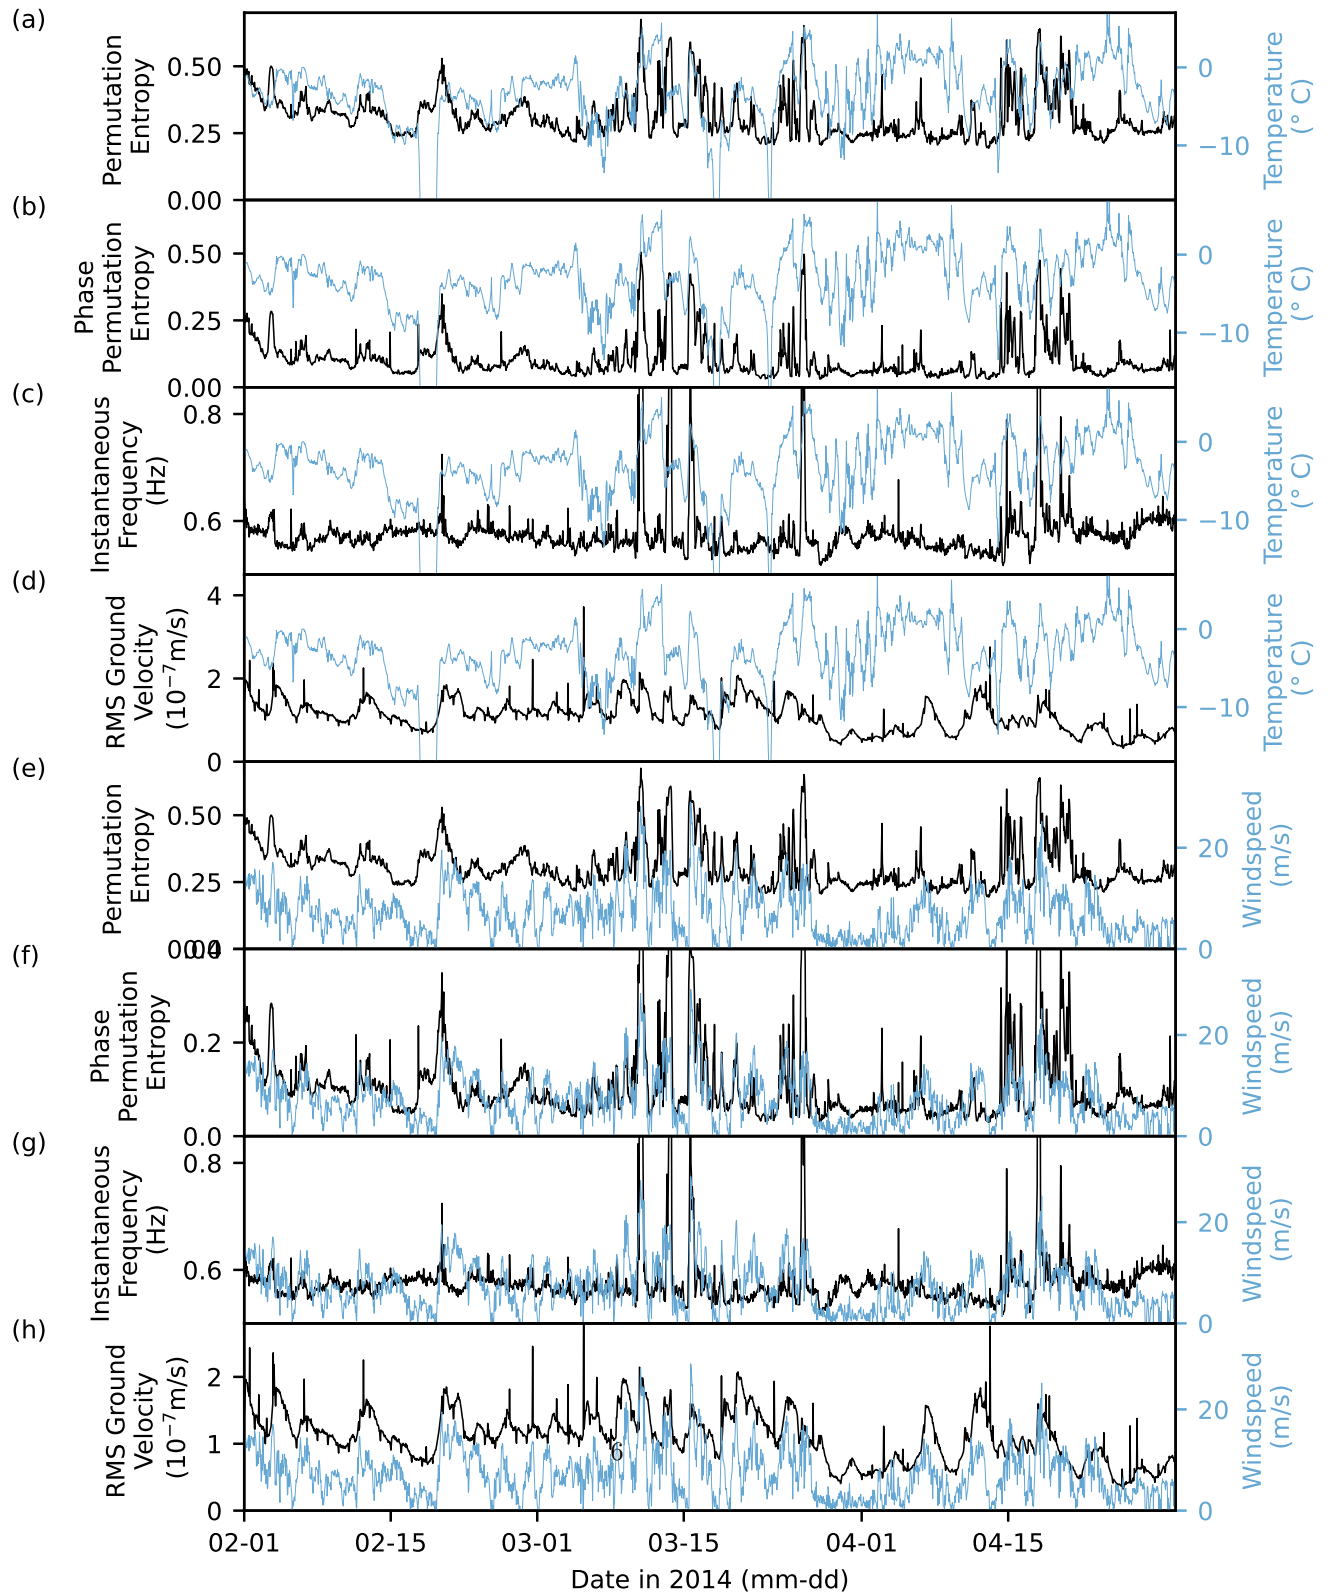

Figure S5: The comparison of air temperature with PE, PPE, IF, and RMS (a-d), and wind speed with the mentioned parameters (e-h) from February to April 2014.

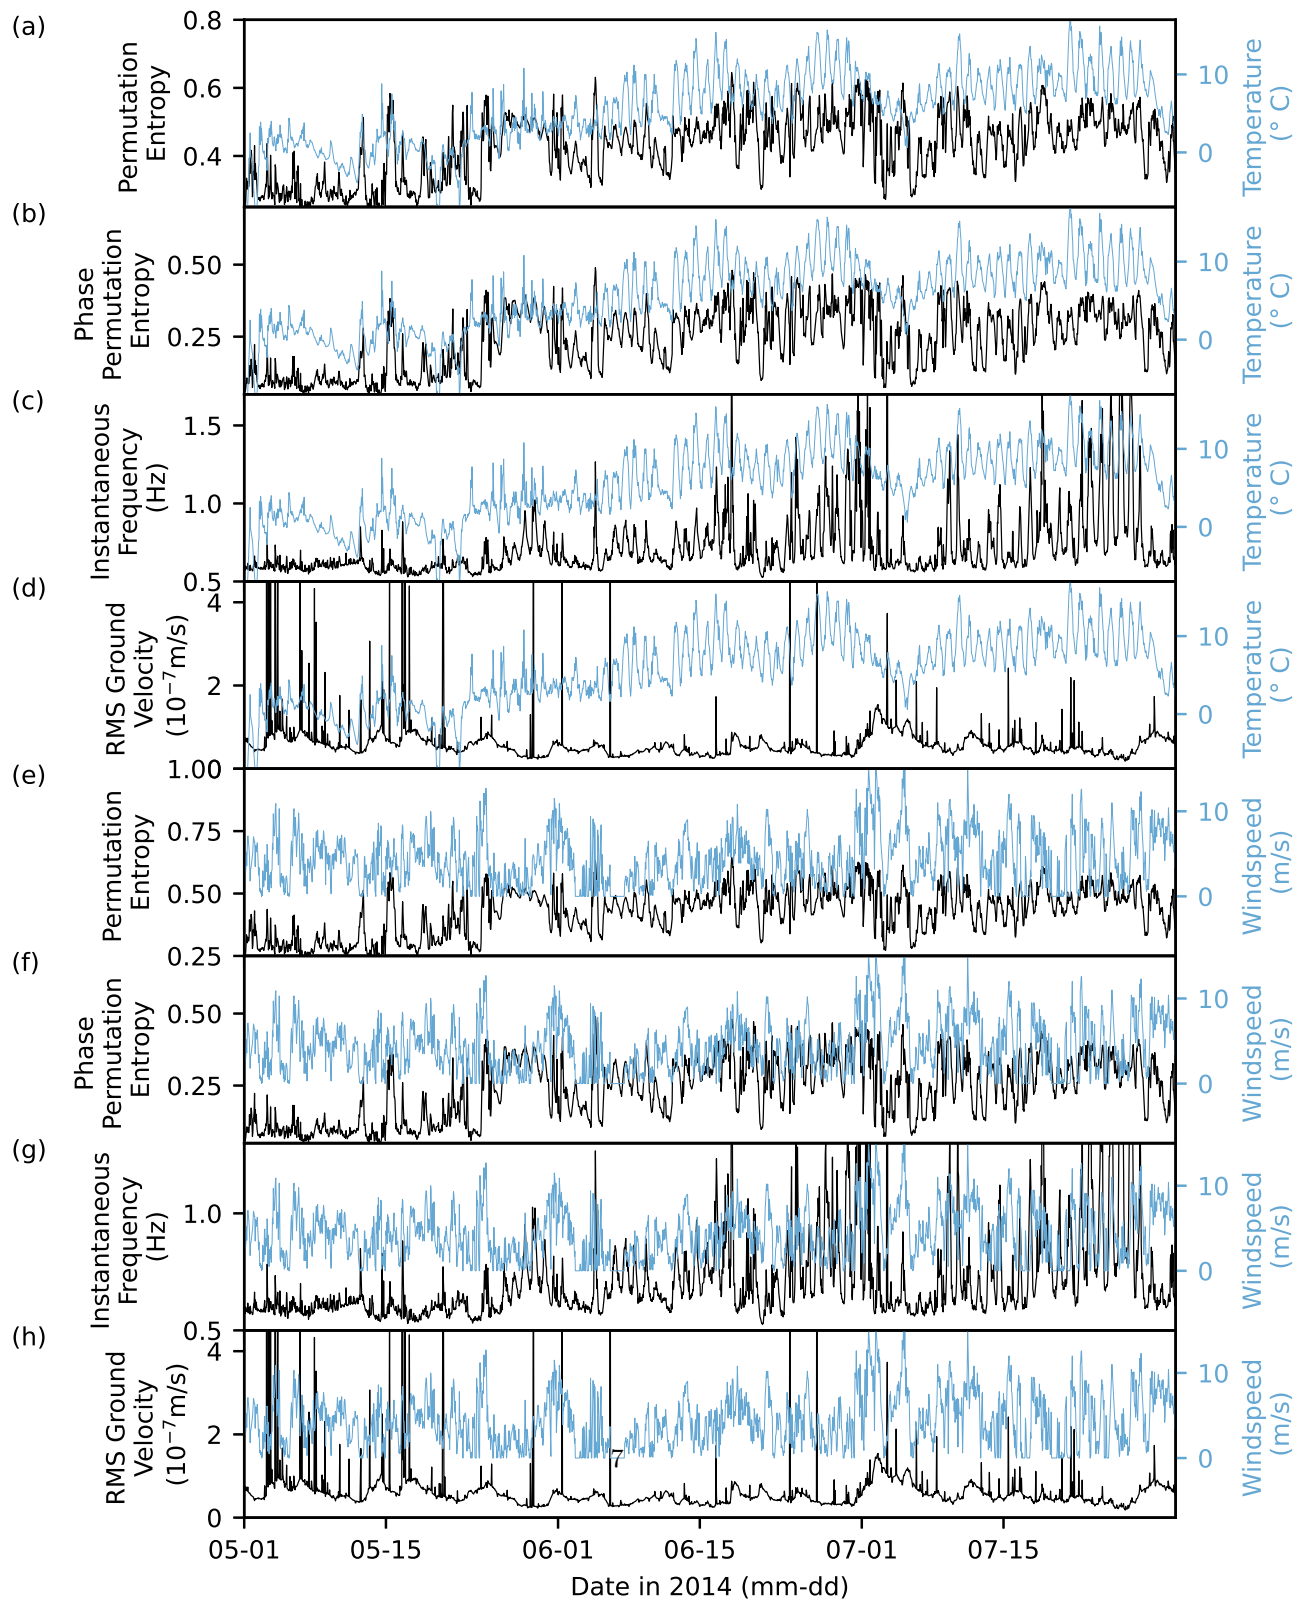

Figure S6: The comparison of air temperature with PE, PPE, IF, and RMS (a-d), and wind speed with the mentioned parameters (e-h) from May to July 2014.



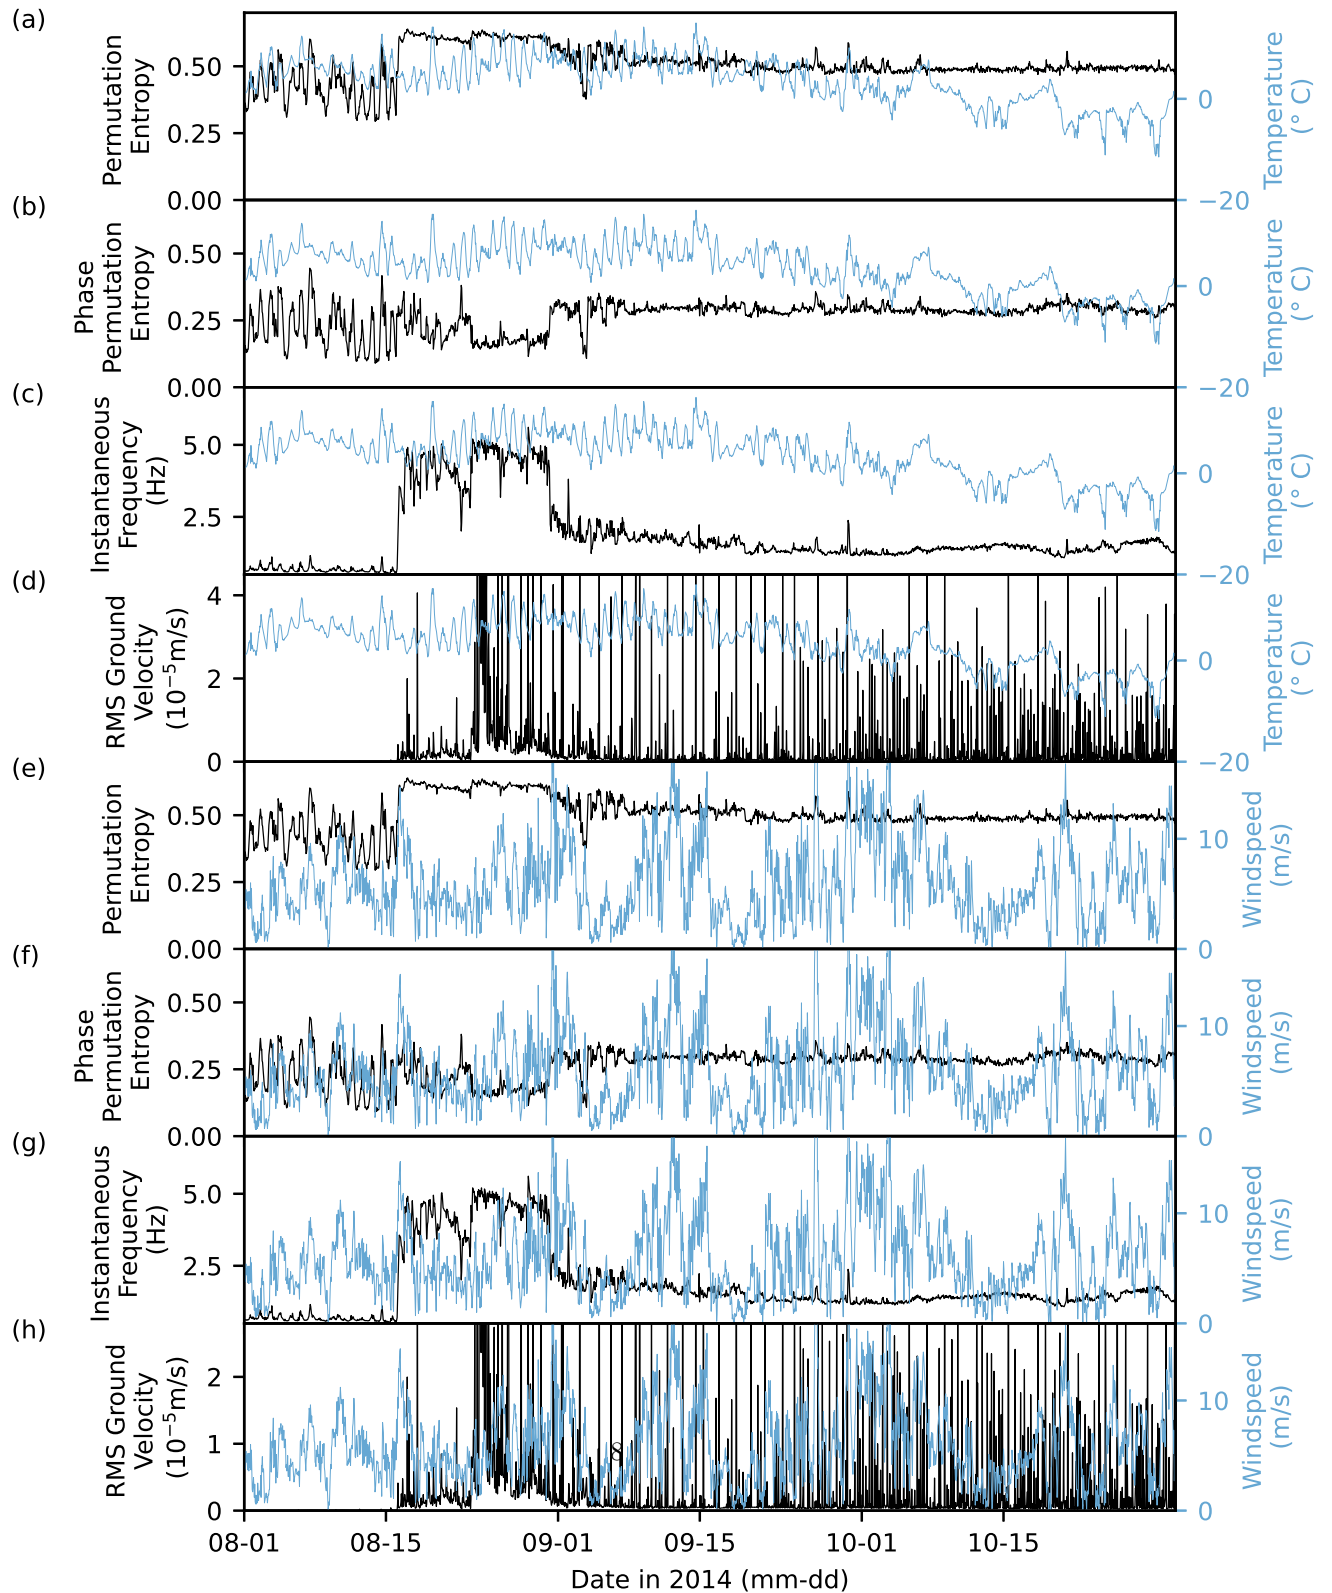

Figure S7: The comparison of air temperature with PE, PPE, IF, and RMS (a-d), and wind speed with the mentioned parameters (e-h) from August to October 2014.

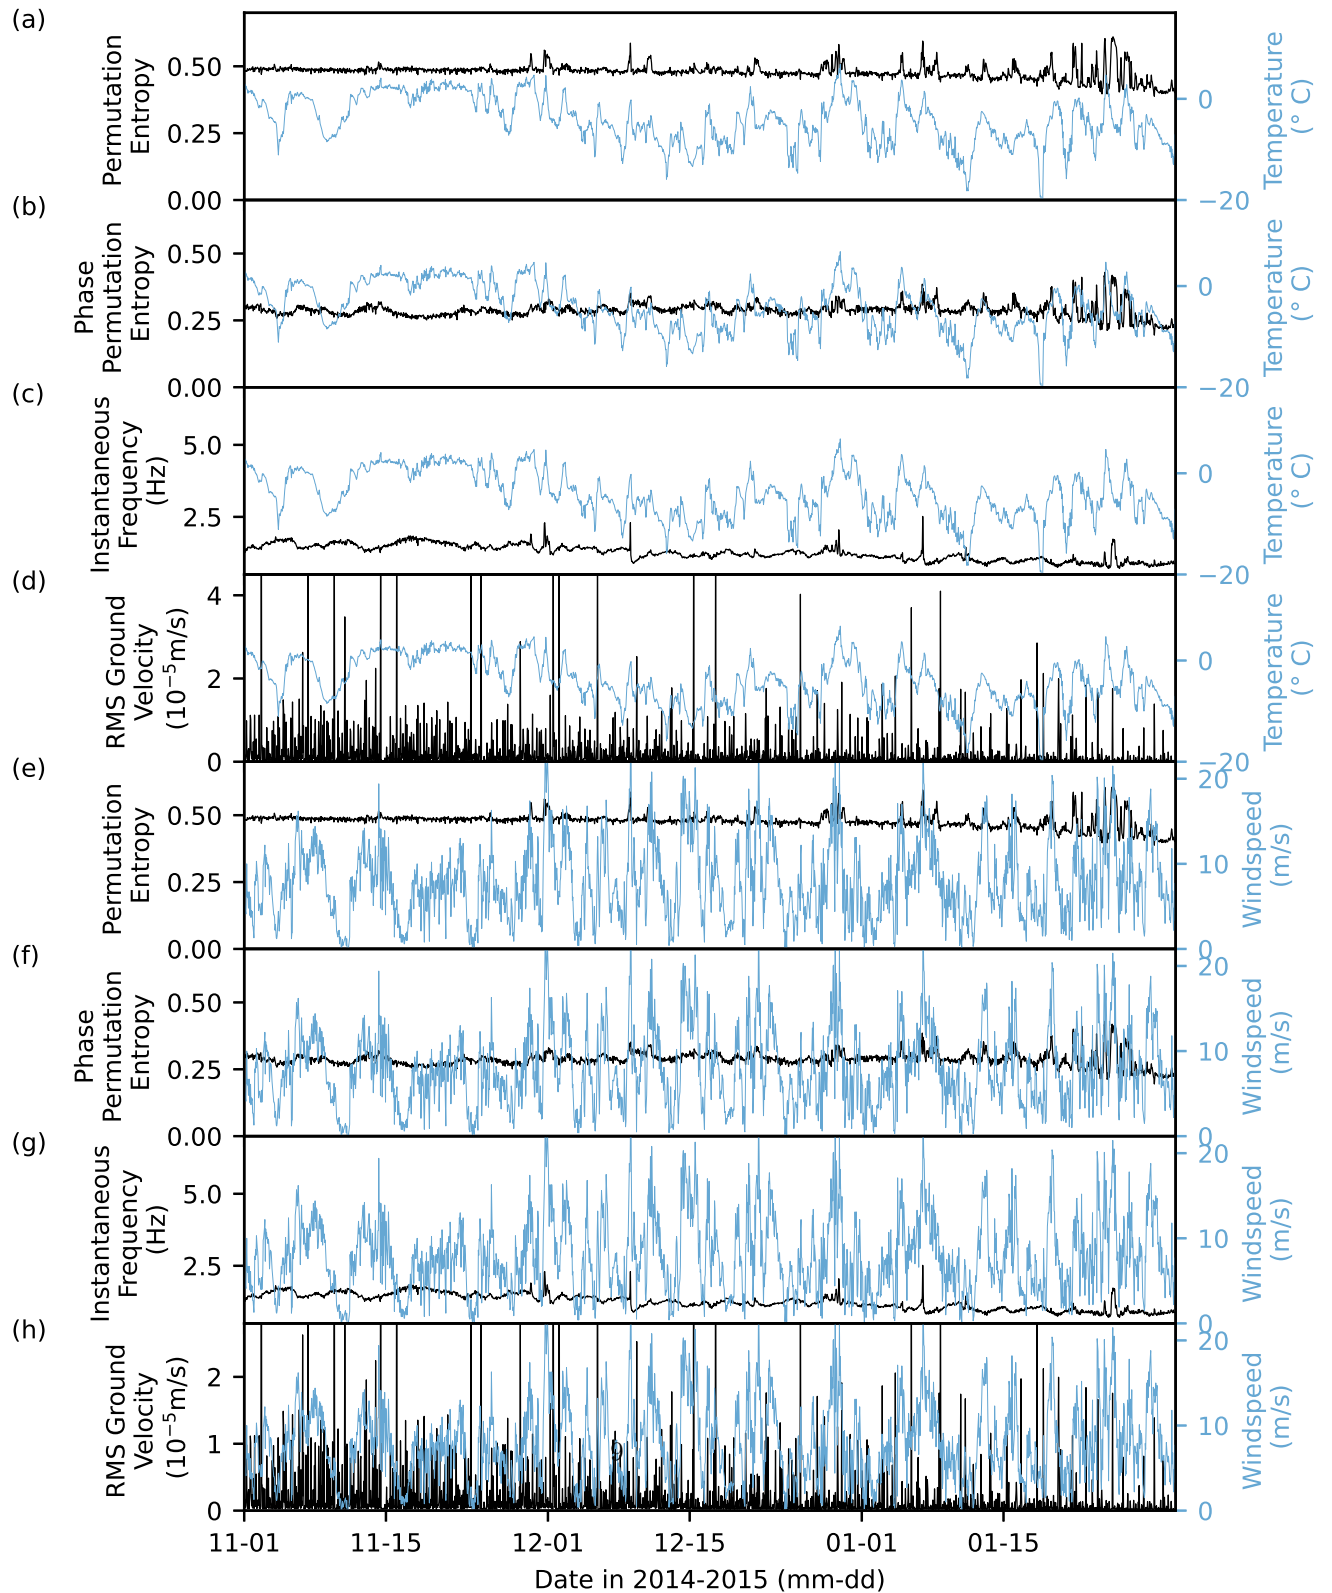

Figure S8: The comparison of air temperature with PE, PPE, IF, and RMS (a-d), and wind speed with the mentioned parameters (e-h) from November 2014 to January 2015.

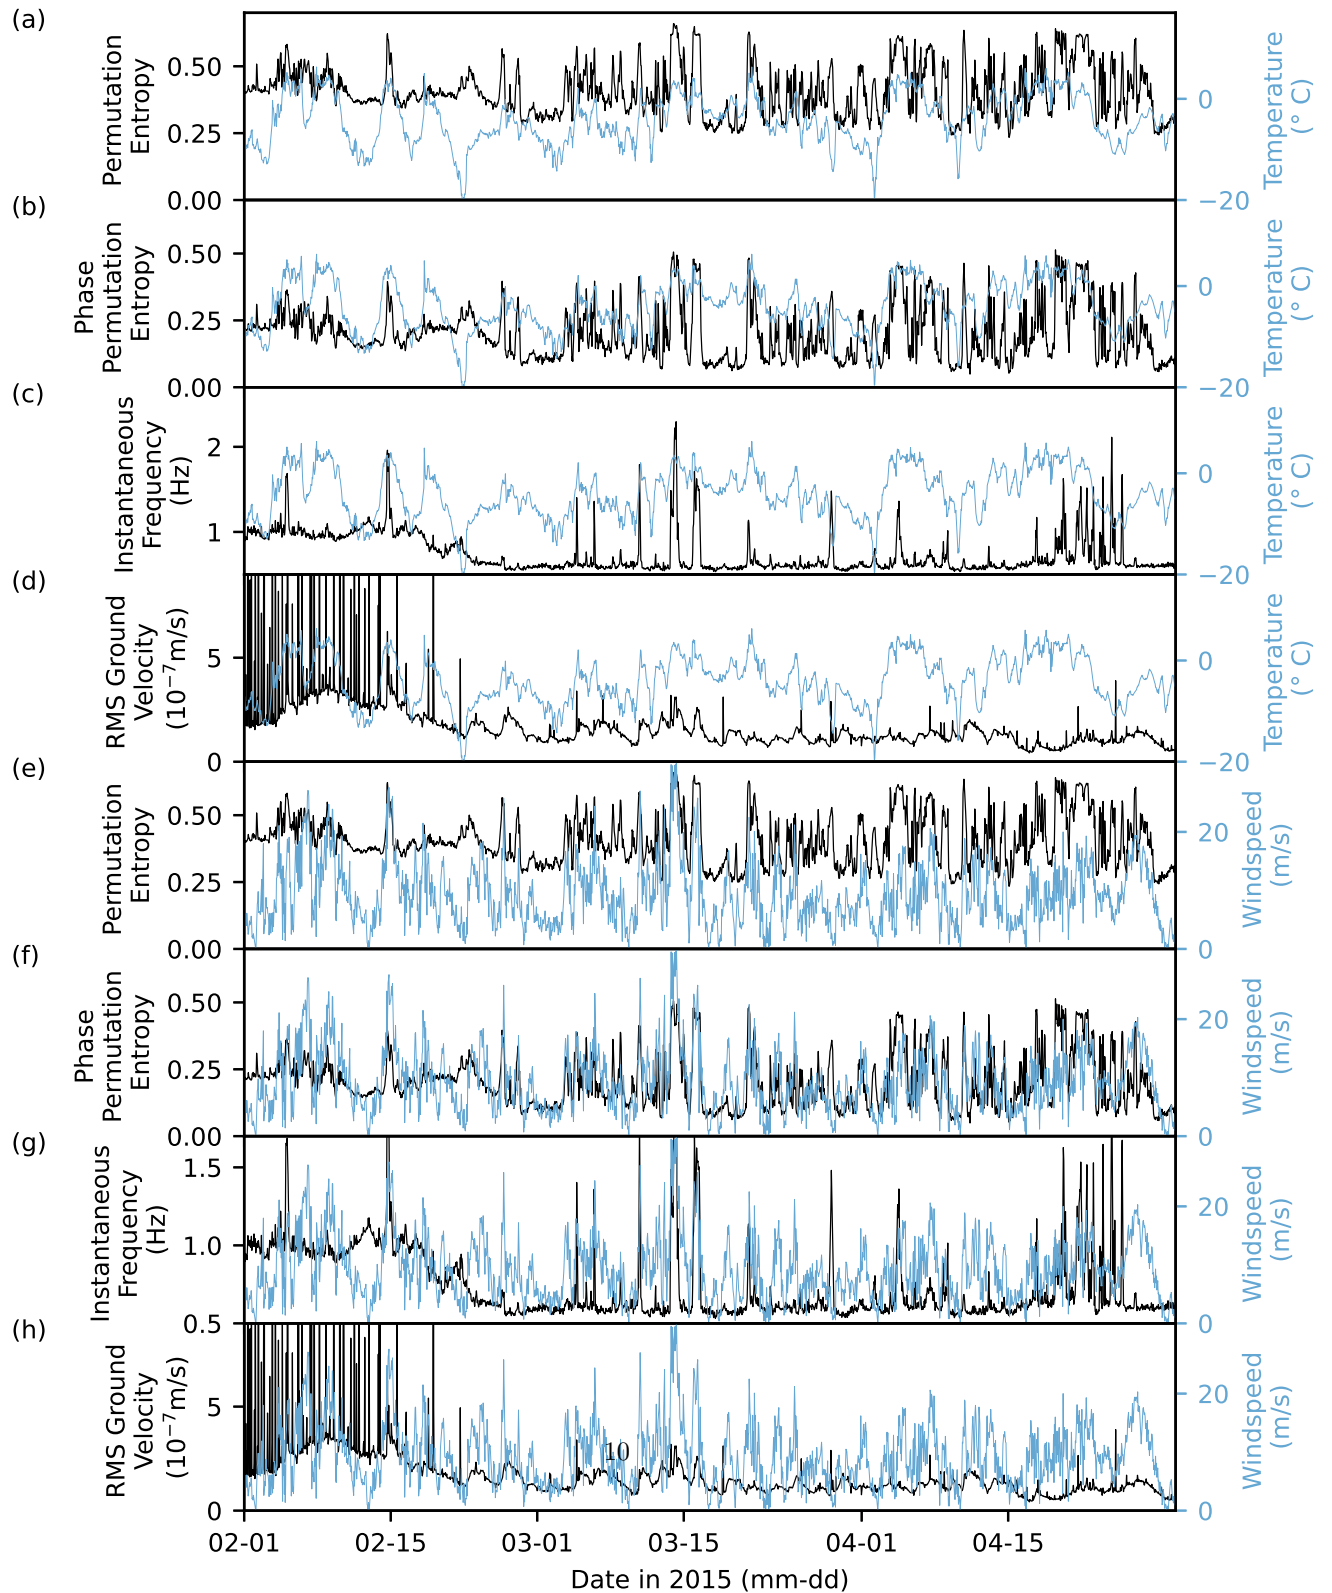

Figure S9: The comparison of air temperature with PE, PPE, IF, and RMS (a-d), and wind speed with the mentioned parameters (e-h) from February to April 2015.

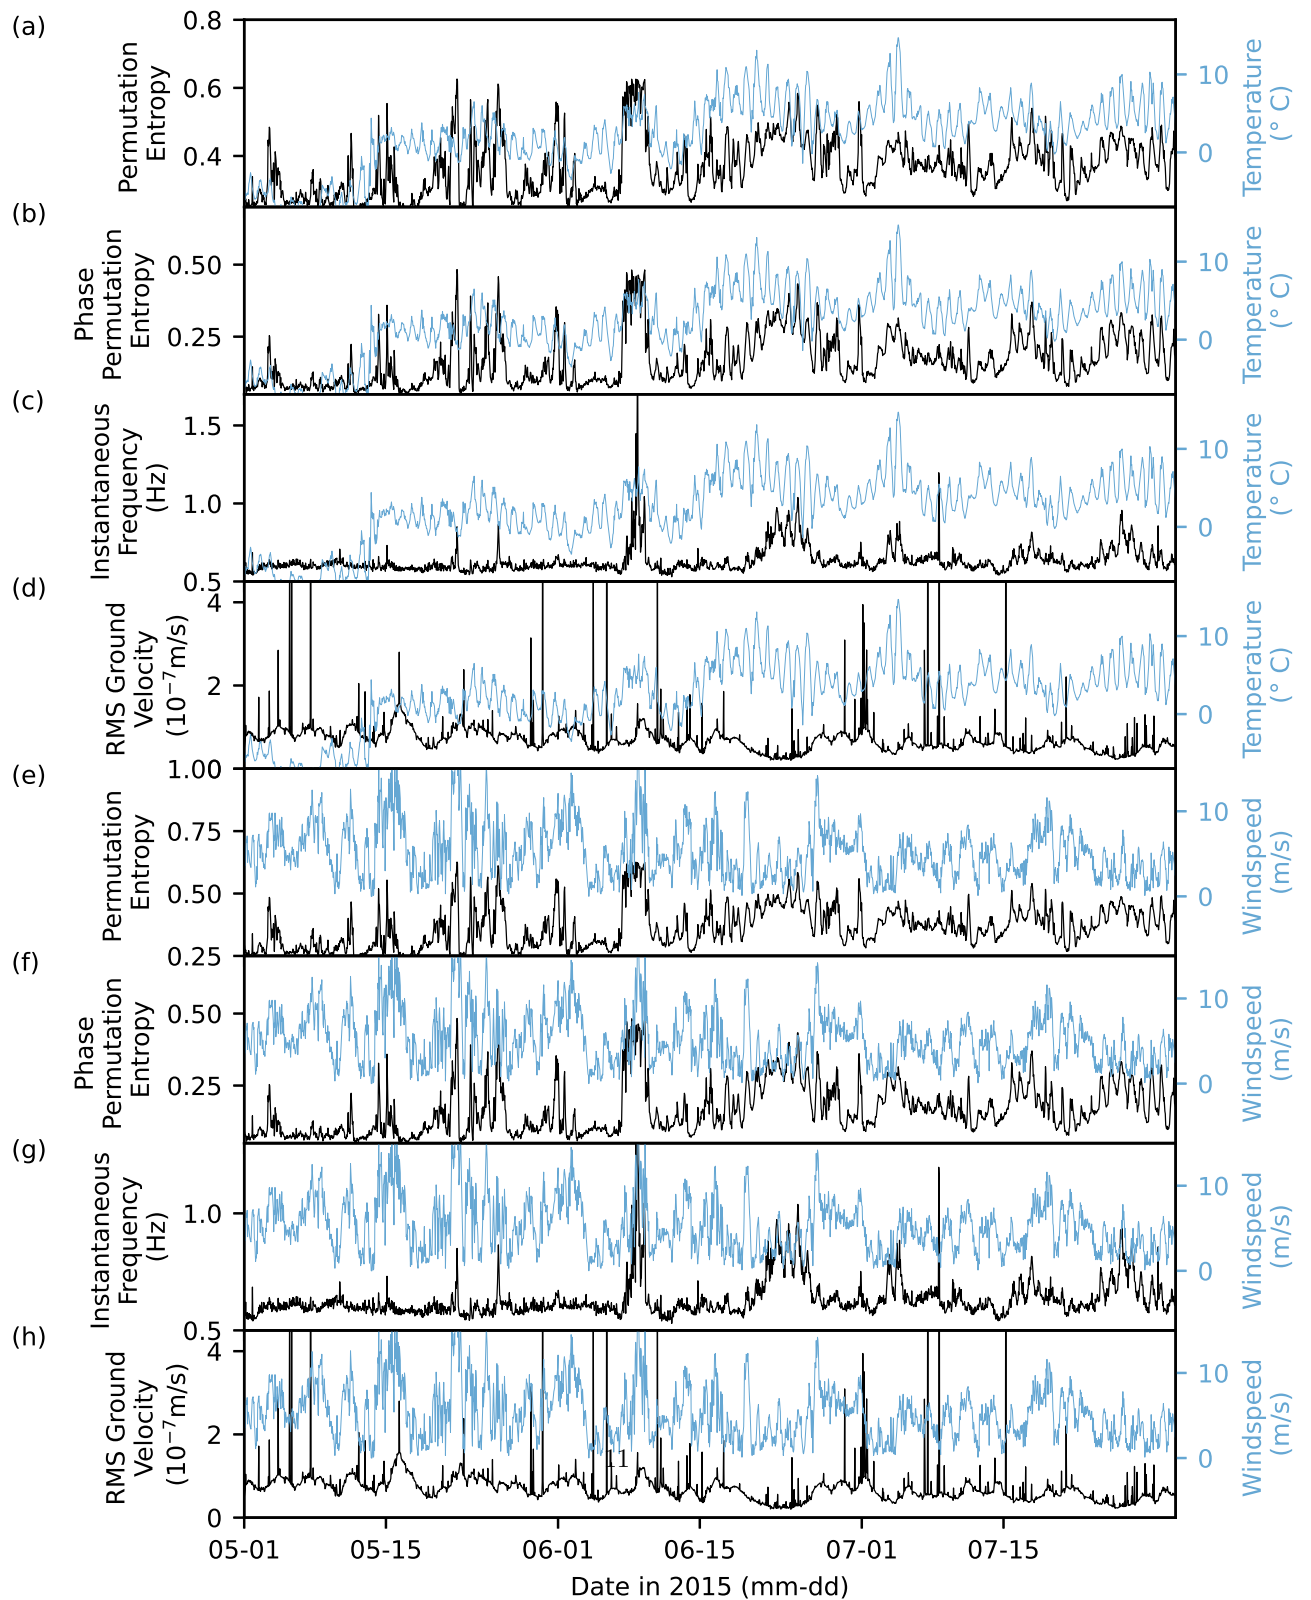

Figure S10: The comparison of air temperature with PE, PPE, IF, and RMS (a-d), and wind speed with the mentioned parameters (e-h) from May to July 2015.

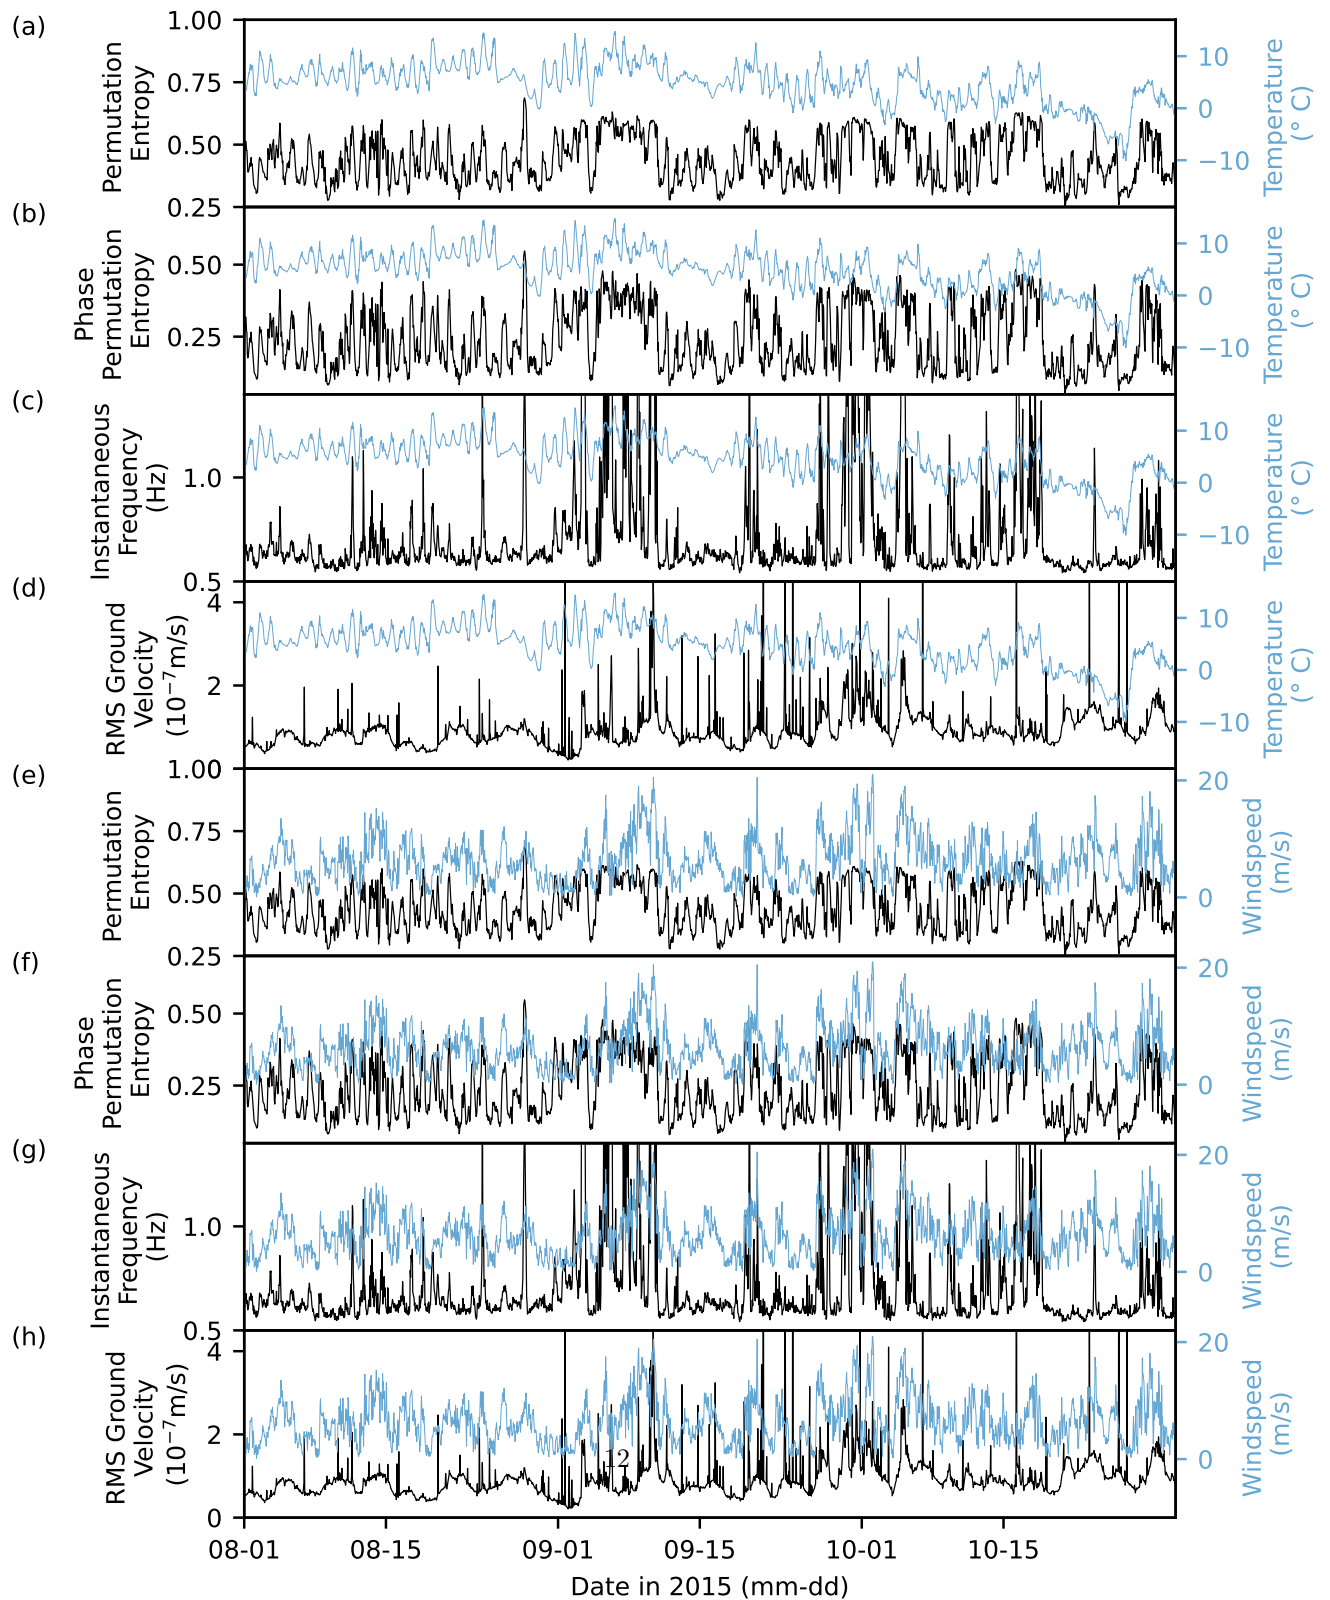

Figure S11: The comparison of air temperature with PE, PPE, IF, and RMS (a-d), and wind speed with the mentioned parameters (e-h) from August to October 2015.

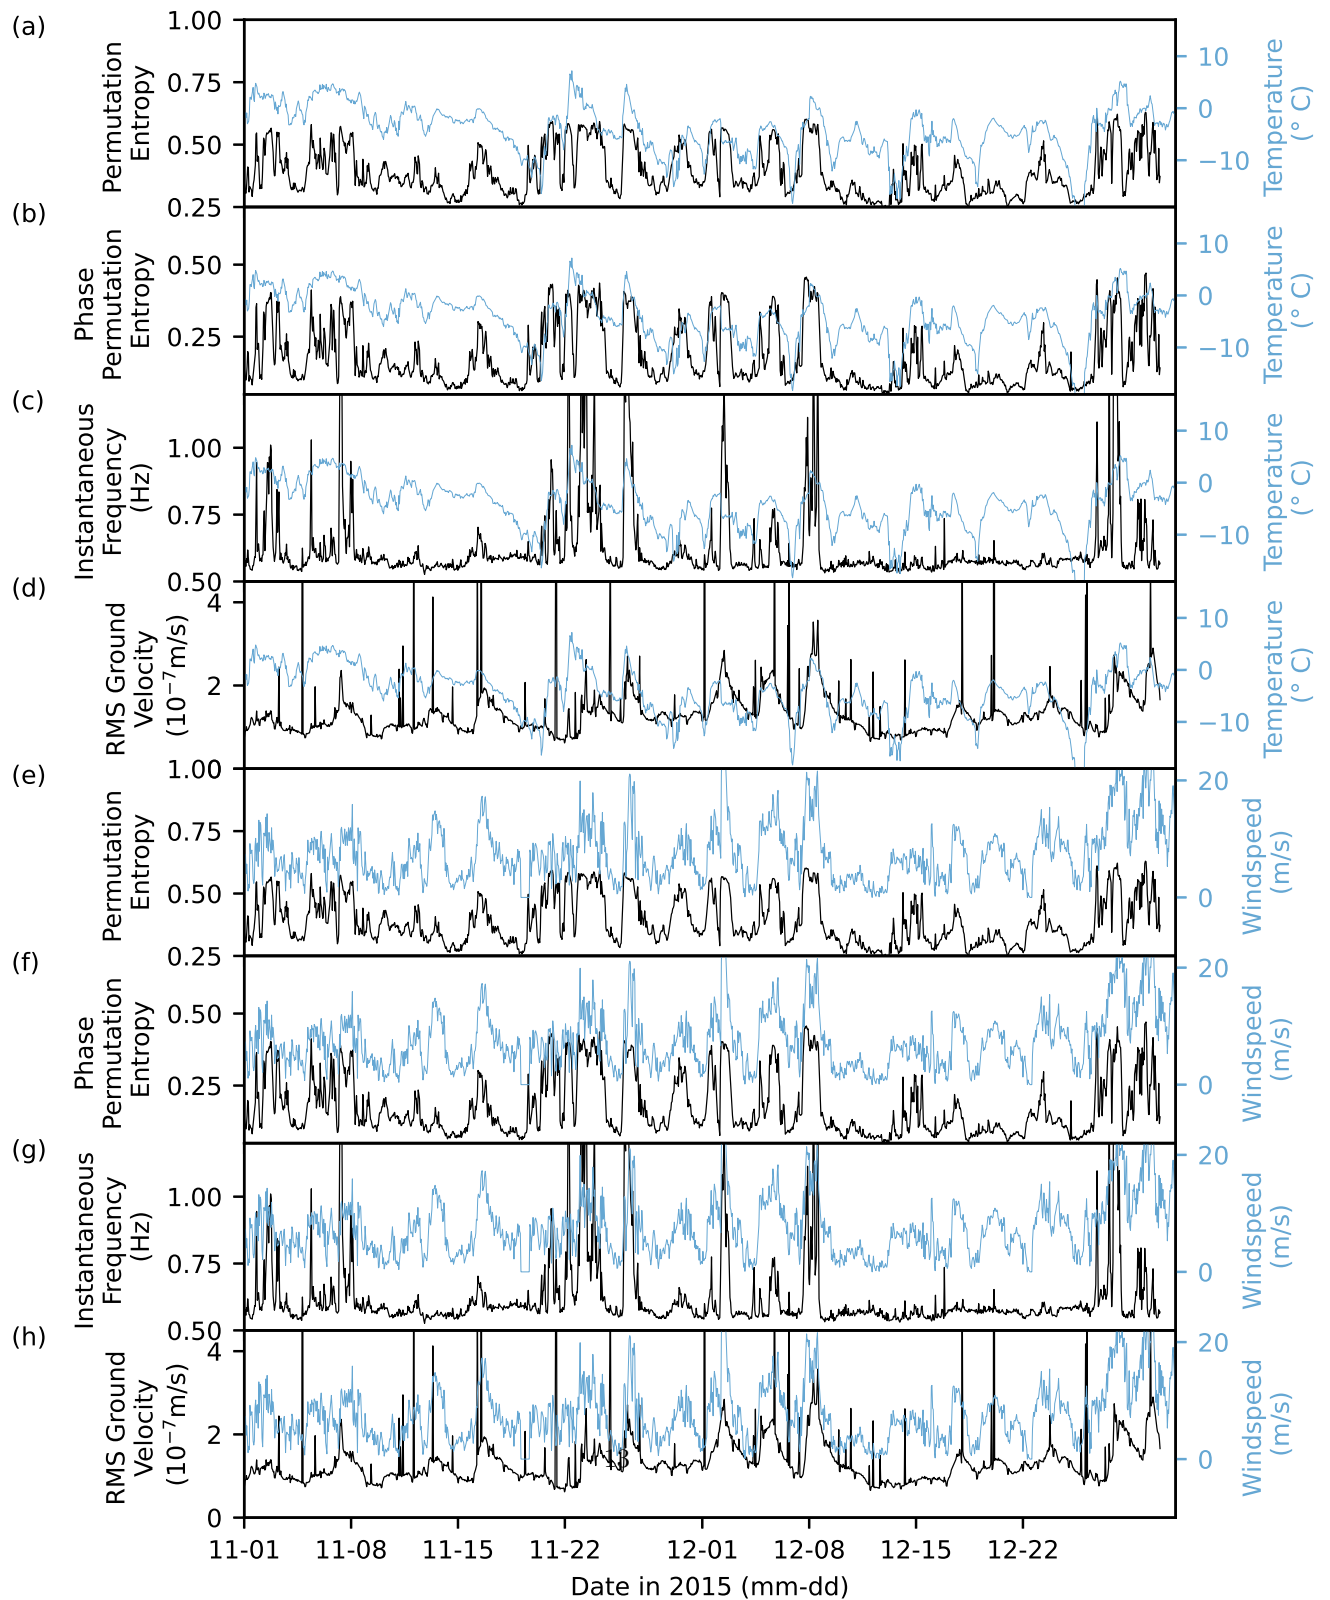

Figure S12: The comparison of air temperature with PE, PPE, IF, and RMS (a-d), and wind speed with the mentioned parameters (e-h) from November to December 2015.
